# Supplementary material
Source: ML conference proceedings conference paper supplement (https://openreview.net/forum?id=ularVAZFjX)
Supplement: supplementary_material [file Catagory_File - Feature 4.pdf › code/cqr/datasets/facebook/facebook+comment+volume+dataset/Dataset/Catagory_File - Feature 4.pdf]

Product/service  
Public figure  
Retail and consumer merchandise  
Athlete  
Education website  
Arts/entertainment/nightlife  
Aerospace/defense  
Actor/director  
Professional sports team  
Travel/leisure  
Arts/humanities website  
Food/beverages  
Record label  
Movie  
Song  
Community  
Company  
Artist  
Non-governmental organization (ngo)  
Media/news/publishing  
Cars  
Clothing  
Local business  
Musician/band  
Politician  
News/media website  
Education  
Author  
Sports event  
Restaurant/cafe  
School sports team  
University  
Tv show  
Website  
Outdoor gear/sporting goods  
Political party  
Sports league  
Entertainer  
Church/religious organization  
Non-profit organization  
Automobiles and parts  
Tv channel  
Telecommunication  
Entertainment website  
Shopping/retail  
Personal blog  
App page  
Vitamins/supplements  
Professional services  
Movie theater  
Software  
Magazine  
Electronics  
School

Just for fun  
Club  
Comedian  
Sports venue  
Sports/recreation/activities  
Publisher  
Tv network  
Health/medical/pharmacy  
Studio  
Home decor  
Jewelry/watches  
Writer  
Health/beauty  
Music video  
Appliances  
Computers/technology  
Insurance company  
Music award  
Recreation/sports website  
Reference website  
Business/economy website  
Bar  
Album  
Games/toys  
Camera/photo  
Book  
Producer  
Landmark  
Cause

Organization  
Tv/movie award  
Hotel  
Health/medical/pharmaceuticals  
Transportation  
Local/travel website  
Musical instrument  
Radio station  
Other  
Computers  
Phone/tablet  
Coach  
Tools/equipment  
Internet/software  
Bank/financial institution  
Society/culture website  
Small business  
News personality  
Teens/kids website  
Government official  
Photographer  
Spas/beauty/personal care  
Video game
